# Supplementary material for: T-Cell Mediated Immune Rejection of Beta-2-Microglobulin Knockout Induced Pluripotent Stem Cell-Derived Kidney Organoids
Source: PubMed Central journal article supplement — Stem Cells Transl Med. 2023 Oct 16;13(1):69–82. doi: 10.1093/stcltm/szad069 (PMC10785221; doi:10.1093/stcltm/szad069), 2023-10-16
Supplement: szad069_suppl_supplementary_tables_s1-s3_figures_s1-s7.pdf [file szad069_suppl_supplementary_tables_s1-s3_figures_s1-s7.pdf]

## Supplemental items

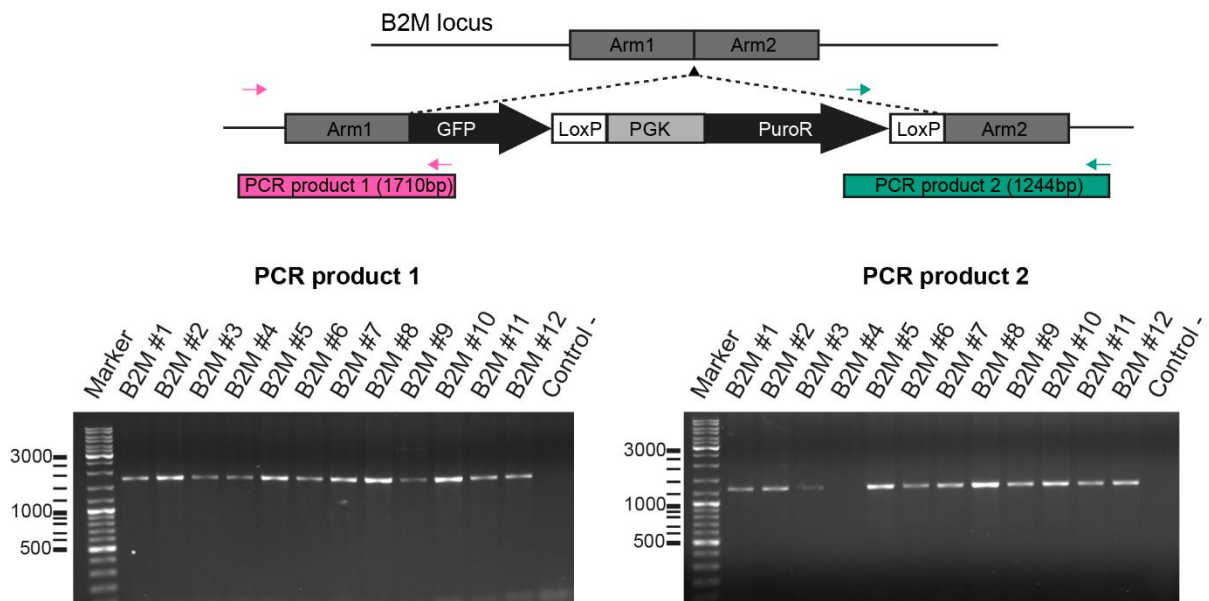

**Figure S1. Genomic validation of B2M targeted clones**

Overview of the genomic PCR performed on all B2M targeted clones with the primer pairs indicated on top. Unmodified control iPSCs were used as negative control (Control -).

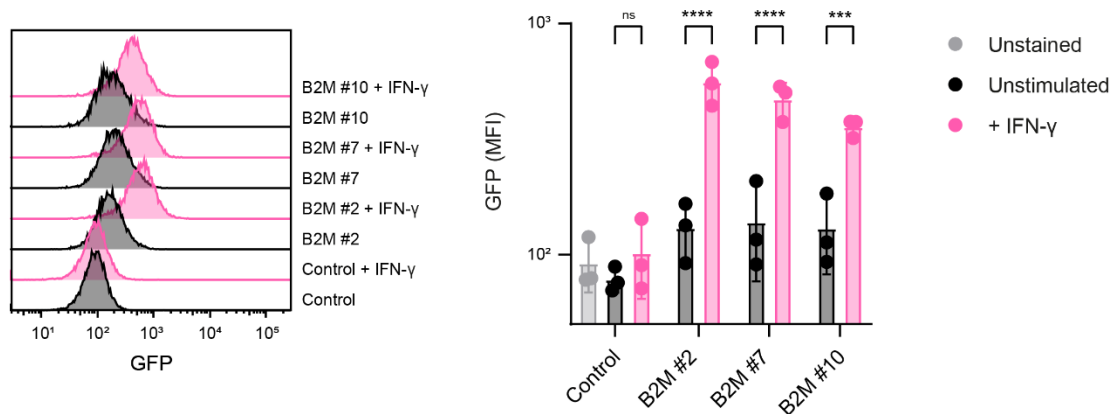

**Figure S2. GFP expression in B2M targeted clones**

GFP protein expression was measured by flow cytometry. Unmodified control iPSCs were used as negative control and for all cell lines results are shown for unstimulated and IFN- $\gamma$  stimulated cells (n = 3 independent experiments).

Results are shown as mean  $\pm$  SD and significance was evaluated using one-way ANOVA with Šidák's correction for multiple testing, comparing each sample to its own unstimulated control (ns = not significant, \*\*\* p<0.001, \*\*\*\* p<0.0001).

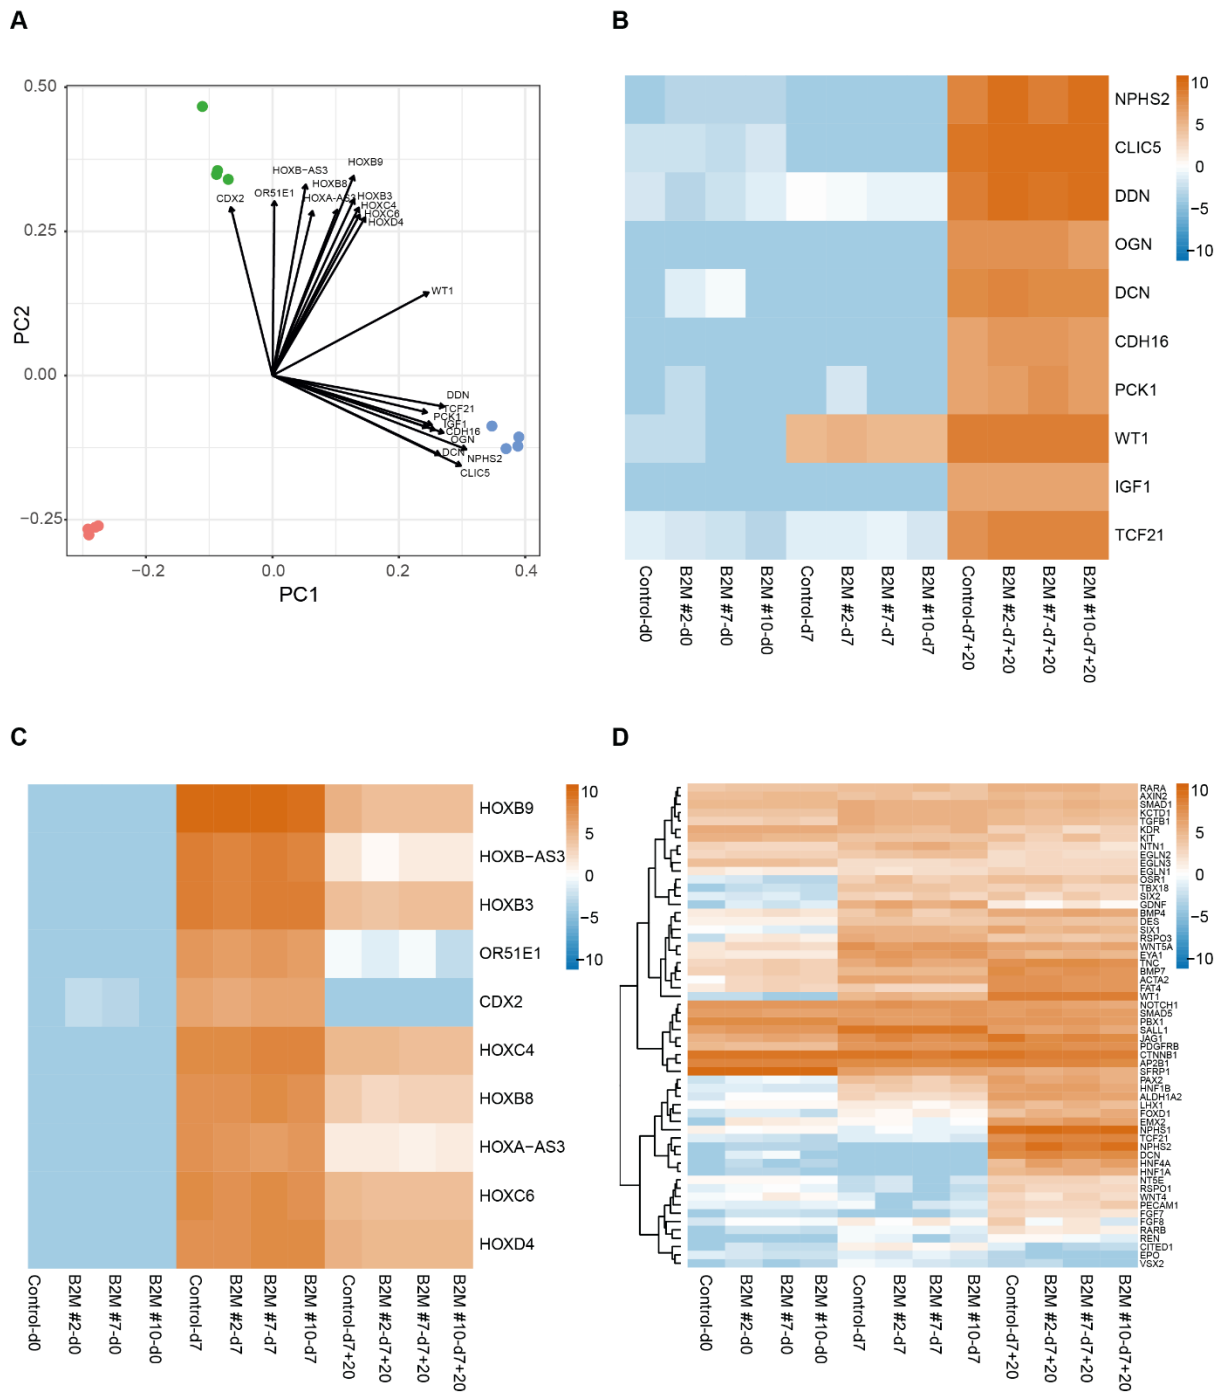

**Figure S3. Detailed analysis of bulk RNA sequencing to study expression of genes during kidney organoid differentiation**

**A**) Principal component analysis plot (similar as Figure 2B) with loadings of the top ten genes contributing to principal component 1 (*NPHS2*, *CLIC5*, *DDN*, *OGN*, *DCN*, *CDH16*, *PCK1*, *WT1*, *IGF1* and *TCF21*) and 2 (*HOXB9*, *HOXB-AS3*, *HOXB3*, *OR51E1*, *CDX2*, *HOXC4*, *HOXB8*, *HOXA-AS3*, *HOXC6* and *HOXD4*). Red dots display day 0 samples, green dots day 7 samples and blue dots day 7 + 20 samples.

**B**) Expression levels (counts per million, cpm) for the top ten genes based on factor loadings contributing to PC1 (*NPHS2*, *CLIC5*, *DDN*, *OGN*, *DCN*, *CDH16*, *PCK1*, *WT1*, *IGF1* and *TCF21*). Heatmap was generated based on cpm based on factor loadings contributing to principal component 1.

**C)** Expression levels (cpm) for the top ten genes based on factor loadings contributing to PC2 (*HOXB9*, *HOXB-AS3*, *HOXB3*, *OR51E1*, *CDX2*, *HOXC4*, *HOXB8*, *HOXA-AS3*, *HOXC6* and *HOXD4*). Heatmap was generated based on cpm based on factor loadings contributing to principal component 2.

**D)** Expression heatmap for markers of kidney cell lineage. Genes were selected from PathCards, pathway unification database [1].

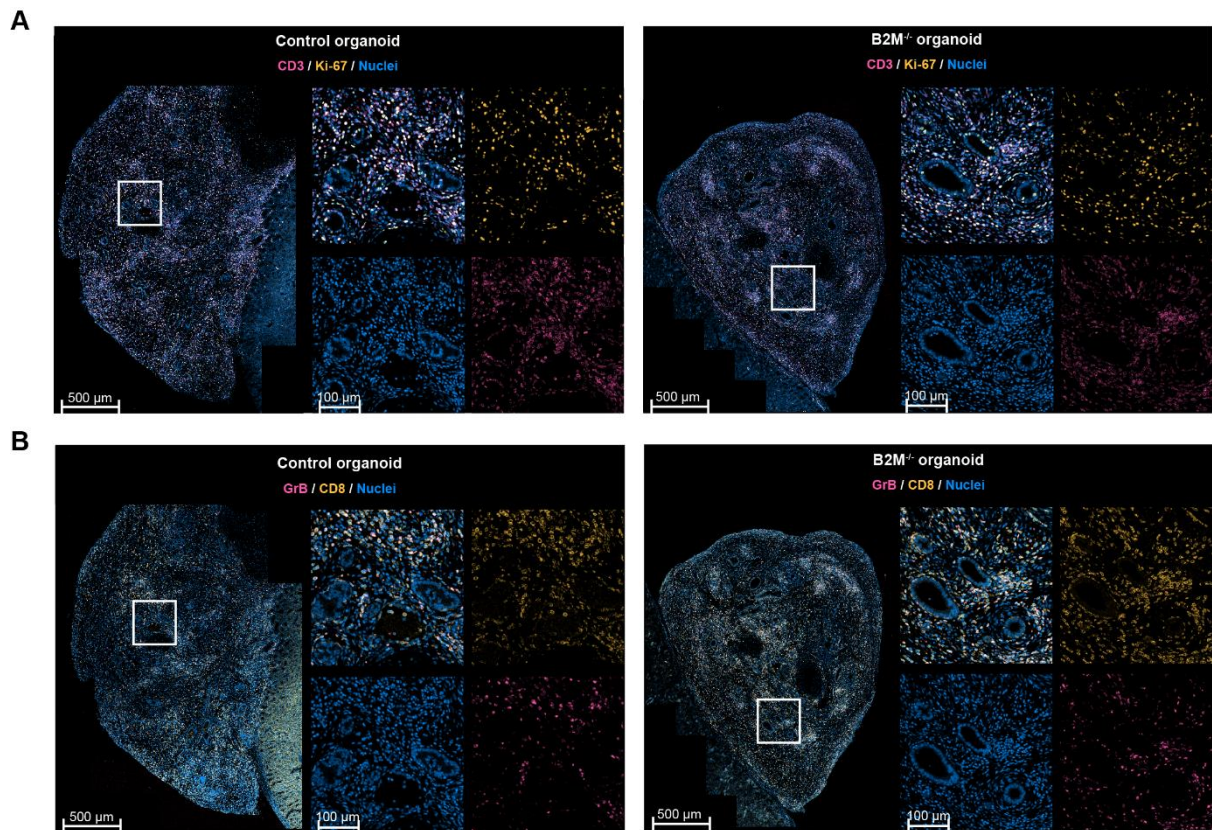

**Figure S4. T cell proliferation and cytotoxic activity in transplanted kidney organoids**

**A** and **B**) Representative fluorescent images of control and B2M<sup>-/-</sup> kidney organoids transplanted in the same mouse stained for **A**) CD3 (pink) and Ki-67 (yellow), and **B**) Granzyme B (pink) and CD8 (yellow). For each image a magnification is shown of the region indicated with a white square, including the separate fluorescent channels.

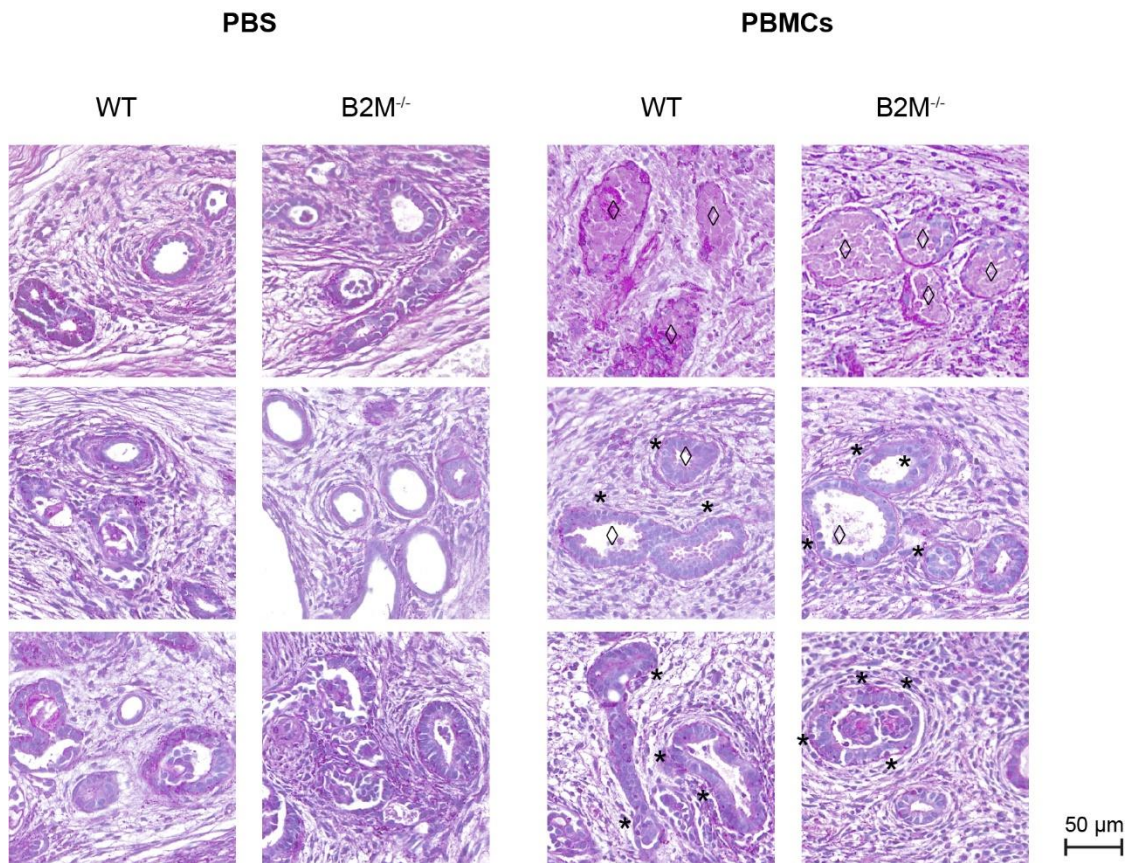

**Figure S5. Tissue morphology in transplanted kidney organoids**

Representative images of PAS stained transplanted kidney organoid sections of organoids collected at day 35 after transplantation. Pictures on the left show control and B2M<sup>-/-</sup> organoids of 3 separate mice injected with PBS and pictures on the right of 3 mice injected with PBMCs. Control and B2M<sup>-/-</sup> pictures next to each other originate from the same mouse. Locations where T cells have infiltrated the tubular wall (tubulitis) are indicated with \*, and loss of tubular integrity (cytotoxicity) with  $\diamond$ .

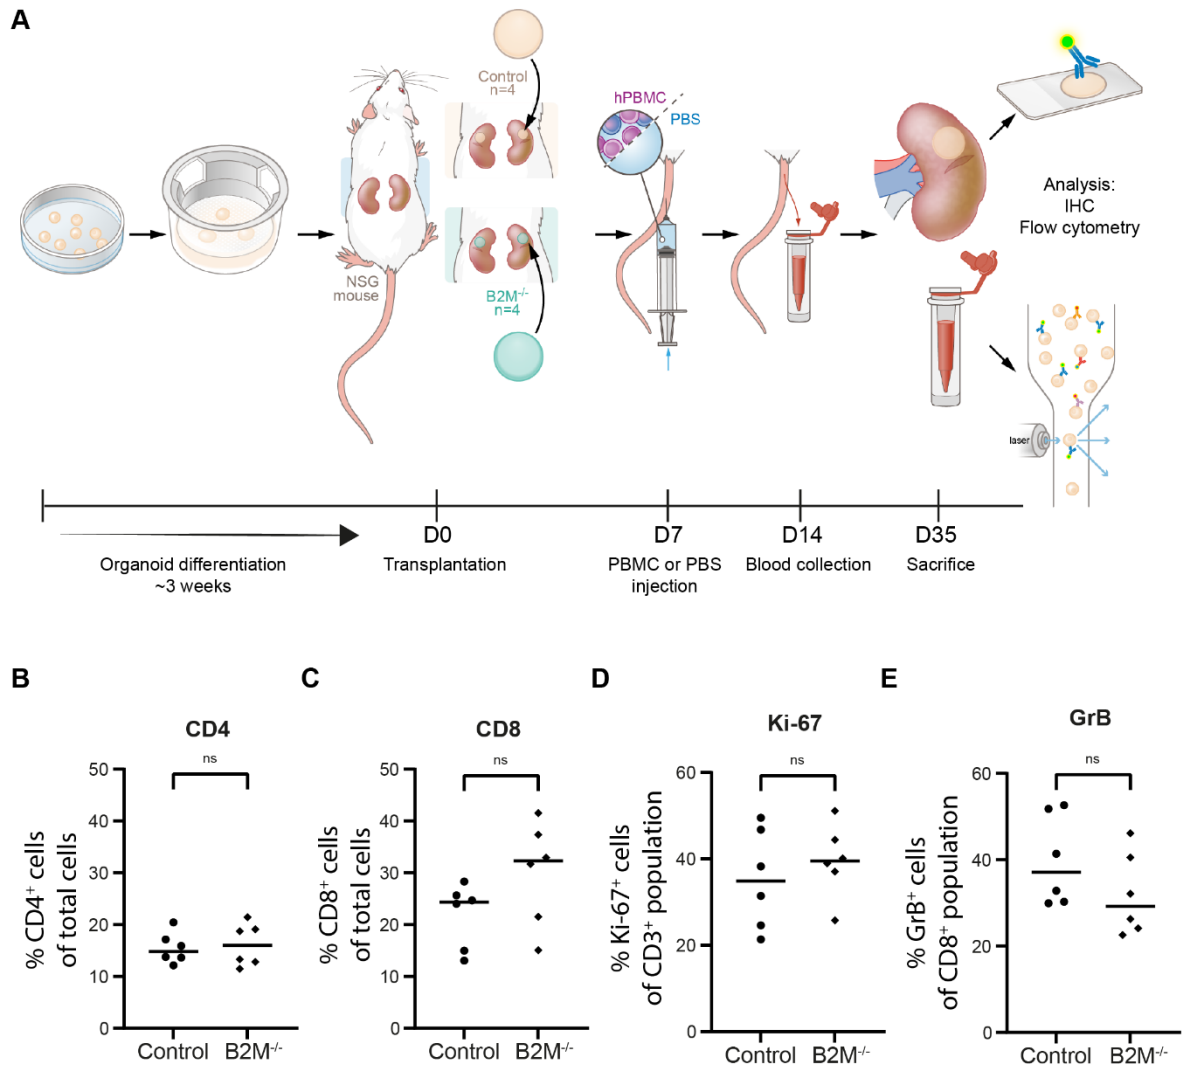

**Figure S6. Rejection upon separate transplantation of control and B2M<sup>-/-</sup> kidney organoids**

**A)** Schematic of the *in vivo* experimental model with transplantation of either control or B2M<sup>-/-</sup> organoids on both kidneys in each mouse. 4 mice were transplanted with control organoids and 4 other mice were transplanted with B2M<sup>-/-</sup> organoids. 1 week after transplantation, 2 mice were injected with PBS (1 control and 1 B2M<sup>-/-</sup> transplanted), and 6 mice were injected with PBMCs (3 control and 3 B2M<sup>-/-</sup> transplanted).

**B-E)** Quantification in stained organoid sections of **B)** the proportion CD4<sup>+</sup> cells of the total cell population, **C)** the proportion CD8<sup>+</sup> cells of the total cell population, **D)** the proportion Ki-67<sup>+</sup> cells in the CD3<sup>+</sup> cell population, and **E)** the proportion Granzyme B (GrB)<sup>+</sup> cells in the CD8<sup>+</sup> cell population analysed by Qupath. For both control and B2M<sup>-/-</sup>, individual results and mean are shown of 6 organoid sections (3 mice with each 2 transplants) and significance was evaluated using an unpaired T-test (ns = not significant).

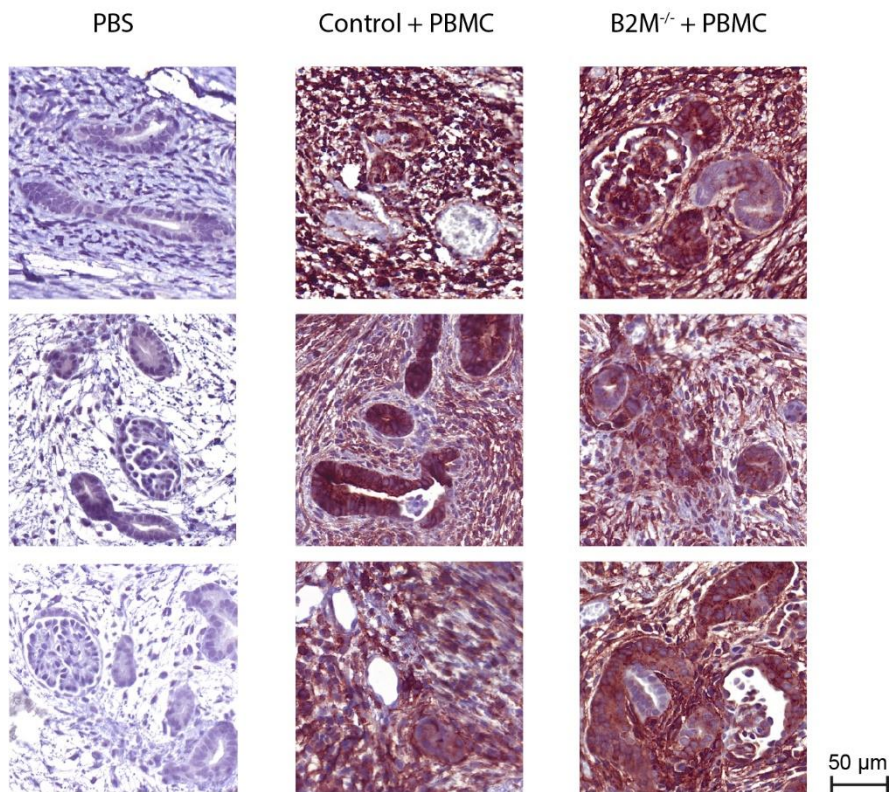

**Figure S7. HLA class II expression in transplanted control and B2M<sup>-/-</sup> kidney organoids**

Representative images of control or B2M<sup>-/-</sup> kidney organoid sections of the separate transplantation experiment stained for HLA-DR/DP/DQ (brown). Left images show 3 separate control organoids transplanted in mice injected with PBS. The middle images show 3 separate control organoids, and the right images 3 separate B2M<sup>-/-</sup> organoids transplanted in mice that were injected with PBMCs.

**Table S1. Primers used for genomic PCR and RT-qPCR**

| Primer set                 | Primer      | Sequence 5' - 3'      |
|----------------------------|-------------|-----------------------|
| <i>Genomic PCR primers</i> |             |                       |
| 1                          | B2M uArm FW | GGCAGATGCAGTCCAAACTCT |
|                            | GFP RV      | CGTTGGGGTCTTTGCTCAGGG |
| 2                          | puroR FW    | GCTCGGCTTCACCGTCAC    |
|                            | B2M dArm RV | GCTCTGGAGAATCTCACGCA  |
| <i>RT-qPCR primers</i>     |             |                       |
| GAPDH                      | FW          | ACAGTCAGCCGCATCTTCTT  |
|                            | RV          | AATGAAGGGGTCATTGATGG  |
| B2M                        | FW          | TCGCGCTACTCTCTCTTTCTG |
|                            | RV          | TTCTCTGCTGGATGACGTGAG |
| GFP                        | FW          | ACCCCGACCACATGAAGCAGC |
|                            | RV          | CGTTGGGGTCTTTGCTCAGGG |
| TAP1                       | FW          | TCAGGGCTTTCGTACAGGAG  |
|                            | RV          | TCCGGAACCGTGTGTACTT   |

**Table S2. HLA haplotypes of control iPSCs and 3 PBMC donors**

|             | iPSC           | PBMC1   | PBMC2   | PBMC3    |
|-------------|----------------|---------|---------|----------|
| <b>A</b>    | A*02:01        | A*11:01 | A*02:01 | A*01:01  |
|             | A*32:01        | A*24:02 | A*68:01 | A*26:01  |
| <b>B</b>    | B*15:18        | B*15:01 | B*13:02 | B*08:01  |
|             | B*15:220       | B*37:01 | B*14:02 | B*38:01  |
| <b>C</b>    | C*07:04/07:181 | C*03:03 | C*02:02 | C*07:01  |
|             | C*12:03/12:28  | C*06:02 | C*06:02 | C*12:03  |
| <b>DRB1</b> | DRB1*03        | DRB1*08 | DRB1*07 | DRB1*03  |
|             | DRB1*08        | DRB1*13 | DRB1*11 | DRB1*13: |
| <b>DRB3</b> | DRB3           | DRB3*02 | DRB3*02 | DRB3*01  |
|             |                |         | DRB4*01 |          |
| <b>DQB1</b> | DQB1*02        | DQB1*04 | DQB1*02 | DQB1*02  |
|             | DQB1*04        | DQB1*06 | DQB1*03 | DQB1*06  |

HLA typing was performed for HLA-A, -B, -C, -DRB1, -DRB3, and -DQB1. Matching HLA type of PBMC and iPSC donor are indicated in green. The degree of similarity in HLA type between PBMC donors and iPSC donor is indicated in the iPSC column (red is no match, orange is 1 matching donor, yellow is 2 matching donors).



**Table S3. Antibodies used in flow cytometry and immunohistochemistry**

| <b>Antibody</b>                                  | <b>Dilution</b> | <b>Product code, company</b> |
|--------------------------------------------------|-----------------|------------------------------|
| <i>Flow cytometry</i>                            |                 |                              |
| PE-conjugated mouse anti- HLA-ABC                | 1:100           | 555553, BD Biosciences       |
| APC-conjugated anti-CD137                        | 1:20            | 550890, BD Biosciences       |
| APC-conjugated anti-CD54 (ICAM-1)                | 1:80            | 353112, Biolegend            |
| PB-conjugated mouse-anti-human CD45              | 1:50            | MCA87PB, Serotec             |
| FITC-conjugated mouse-anti-human CD3             | 1:50            | 345763, BD Biosciences       |
| PE-conjugated mouse-anti-human CD4               | 1:20            | 555347, BD Biosciences       |
| PerCP-Cy5.5-conjugated anti-CD8                  | 1:200           | 344710, Biolegend            |
| V500-conjugated mouse-anti-human CD14            | 1:50            | 562693, BD Biosciences       |
| AF700-conjugated mouse-anti-human CD19           | 1:50            | 56-0199, eBioscience         |
| APC-conjugated mouse-anti-human CD56             | 1:50            | 17-0567-42, eBioscience      |
| APC-Cy7-conjugated mouse-anti-mouse CD45.2       | 1:100           | 560694, BD Biosciences       |
| <i>Immunohistochemistry primary antibodies</i>   |                 |                              |
| sheep anti-human NPHS1                           | 1:100           | AF4269, R&D Systems          |
| mouse anti-E-Cadherin                            | 1:250           | 610181, BD                   |
| biotinylated Lotus Tetragonolobus Lectin (LTL)   | 1:300           | B-1325, Vector Laboratories  |
| rabbit anti-CD3e                                 | 1:200           | MA1-90582, Invitrogen        |
| rabbit anti-CD4                                  | Ready to use    | 5552737001, Roche            |
| mouse anti-CD8                                   | 1:200           | M7103, DAKO                  |
| mouse anti-Ki-67                                 | 1:200           | M7240, DAKO                  |
| rabbit anti-Granzyme B (GrB)                     | 1:100           | 262R-15-RUO, Sigma-Aldrich   |
| mouse anti-HLA-DP, DQ, DR                        | 1:100           | M0775, DAKO                  |
| <i>Immunohistochemistry secondary antibodies</i> |                 |                              |
| donkey anti-sheep Alexa-647                      | 1:500           | A21448, Invitrogen           |
| donkey anti-mouse Alexa-488                      | 1:500           | A21202, Invitrogen           |
| donkey anti-rabbit Alexa-568                     | 1:500           | A10042, Invitrogen           |
| Streptavidin conjugated with Alexa-532           | 1:500           | S11224, Invitrogen           |
| HRP conjugated goat anti-mouse                   | 1:200           | P0447, DAKO                  |

**Reference**

1. PathCards, pathway unification database; markers of kidney cell lineage. Weizmann institute of Science; Updated 2023 May 31; Version 5.16.984.0. Available from: [https://pathcards.genecards.org/Card/markers\\_of\\_kidney\\_cell\\_lineage?queryString=kidney%20marker](https://pathcards.genecards.org/Card/markers_of_kidney_cell_lineage?queryString=kidney%20marker)
